# Supplementary material for: Glycemic Variability Percentage: A Novel Method for Assessing Glycemic Variability from Continuous Glucose Monitor Data
Source: PubMed Central journal article supplement (PMC5846572; doi:10.1089/dia.2017.0187), 2018-01-01
Supplement: Supp_Table1.pdf [file Supp_Table1.pdf]

## Supplementary Data

SUPPLEMENTARY TABLE S1. UPPER BOUNDS OF MEAN AMPLITUDE OF GLYCEMIC EXCURSIONS (MAGE)  
FOR EACH QUARTILE FROM INTERQUARTILE ANALYSIS OF GLYCEMIC VARIABILITY DATA IN ADULTS (>18 y/o)  
WITHOUT DIABETES, WITH TYPE 2 DIABETES AND WITH TYPE 1 DIABETES

| <i>MAGE metric<br/>for glycemic variability</i> | <i>Adults<br/>without<br/>diabetes (mg/dL)</i> | <i>Adults with<br/>type 2<br/>diabetes (mg/dL)</i> | <i>Adults<br/>with type 1<br/>diabetes (mg/dL)</i> | <i>Children<br/>with type 1<br/>diabetes (mg/dL)</i> | <i>Adolescents<br/>with type 1<br/>diabetes (mg/dL)</i> |
|-------------------------------------------------|------------------------------------------------|----------------------------------------------------|----------------------------------------------------|------------------------------------------------------|---------------------------------------------------------|
| 0th Pct. (min)                                  | 24.5                                           | 49.2                                               | 92.8                                               | 110.8                                                | 92.2                                                    |
| 2.5th Pct.                                      | 29.0                                           | 57.1                                               | 103.5                                              | 125.0                                                | 115.5                                                   |
| 25th Pct.                                       | 34.8                                           | 93.9                                               | 144.4                                              | 155.8                                                | 156.1                                                   |
| 50th Pct.                                       | 41.0                                           | 115.6                                              | 178.2                                              | 182.2                                                | 180.9                                                   |
| 75th Pct.                                       | 46.8                                           | 134.6                                              | 201.6                                              | 215.1                                                | 209.1                                                   |
| 97.5th Pct.                                     | 64.7                                           | 218.5                                              | 246.5                                              | 238.5                                                | 265.8                                                   |
| 100th Pct. (max)                                | 69.8                                           | 218.8                                              | 289.1                                              | 244.3                                                | 298.2                                                   |

Also shown is the interquartile analysis for children (<13 y/o) and adolescents (13–18 y/o) with type 1 diabetes.  
MAGE, mean amplitude of glycemic excursions; Pct., percentile.
