# Supplementary material for: Glycemic Variability Percentage: A Novel Method for Assessing Glycemic Variability from Continuous Glucose Monitor Data
Source: PubMed Central journal article supplement (PMC5846572; doi:10.1089/dia.2017.0187), 2018-01-01
Supplement: Supp_Table2.pdf [file Supp_Table2.pdf]

SUPPLEMENTARY TABLE S2. UPPER BOUNDS OF THE COEFFICIENT OF VARIATION (CV) FOR EACH QUARTILE  
FROM INTERQUARTILE ANALYSIS OF GLYCEMIC VARIABILITY DATA IN ADULTS (>18 y/o)  
WITHOUT DIABETES, WITH TYPE 2 DIABETES AND WITH TYPE 1 DIABETES

| <i>CV metric for glycemic variability</i> | <i>Adults without diabetes (%)</i> | <i>Adults with type 2 diabetes (%)</i> | <i>Adults with type 1 diabetes (%)</i> | <i>Children with type 1 diabetes (%)</i> | <i>Adolescents with type 1 diabetes (%)</i> |
|-------------------------------------------|------------------------------------|----------------------------------------|----------------------------------------|------------------------------------------|---------------------------------------------|
| 0th Pct. (min)                            | 11.8                               | 15.6                                   | 24.5                                   | 23.0                                     | 22.4                                        |
| 2.5th Pct.                                | 12.3                               | 16.5                                   | 28.1                                   | 25.4                                     | 26.4                                        |
| 25th Pct.                                 | 15.0                               | 25.4                                   | 36.2                                   | 34.8                                     | 35.9                                        |
| 50th Pct.                                 | 16.7                               | 30.4                                   | 40.3                                   | 37.7                                     | 39.0                                        |
| 75th Pct.                                 | 18.1                               | 35.4                                   | 44.4                                   | 40.5                                     | 42.5                                        |
| 97.5th Pct.                               | 20.9                               | 42.1                                   | 52.5                                   | 44.5                                     | 50.5                                        |
| 100th Pct. (max)                          | 22.0                               | 43.7                                   | 56.9                                   | 44.6                                     | 53.7                                        |

Also shown is the interquartile analysis for children (<13 y/o) and adolescents (13–18 y/o) with type 1 diabetes. CV, coefficient of variation.
